# Supplementary material for: Physicochemical properties and structural dynamics of organic–inorganic hybrid [NH3(CH2)3NH3]ZnX4 (X = Cl and Br) crystals
Source: Sci Rep. 2021 Apr 16;11:8408. doi: 10.1038/s41598-021-87940-2 (PMC8052450; doi:10.1038/s41598-021-87940-2)
Supplement: Supplementary file 1 — Supplementary Information [file 41598_2021_87940_MOESM1_ESM.docx]

**Physicochemical properties and structural dynamics of organic–inorganic hybrid perovskite [NH3(CH2)3NH3]Zn*X*4 (*X*=Cl and Br) crystals**

Ae Ran Lim1, 2, *, Sun Ha Kim3, 4, Yong Lak Joo5

1Department of Carbon Convergence Engineering, Jeonju University, Jeonju 55069, Korea.

2Department of Science Education, Jeonju University, Jeonju 55069, Korea. email: [arlim@jj.ac.kr](mailto:arlim@jj.ac.kr)

3Korea Basic Science Institute, Seoul Western Center, Seoul 03759, Korea.

4Department of Chemistry, Kyungpook National University, Daegu 41566, Korea.

5Robert Fredrick Smith School of Chemical and Biomolecular Engineering, Cornell University, Ithaca, NY 14853, USA.


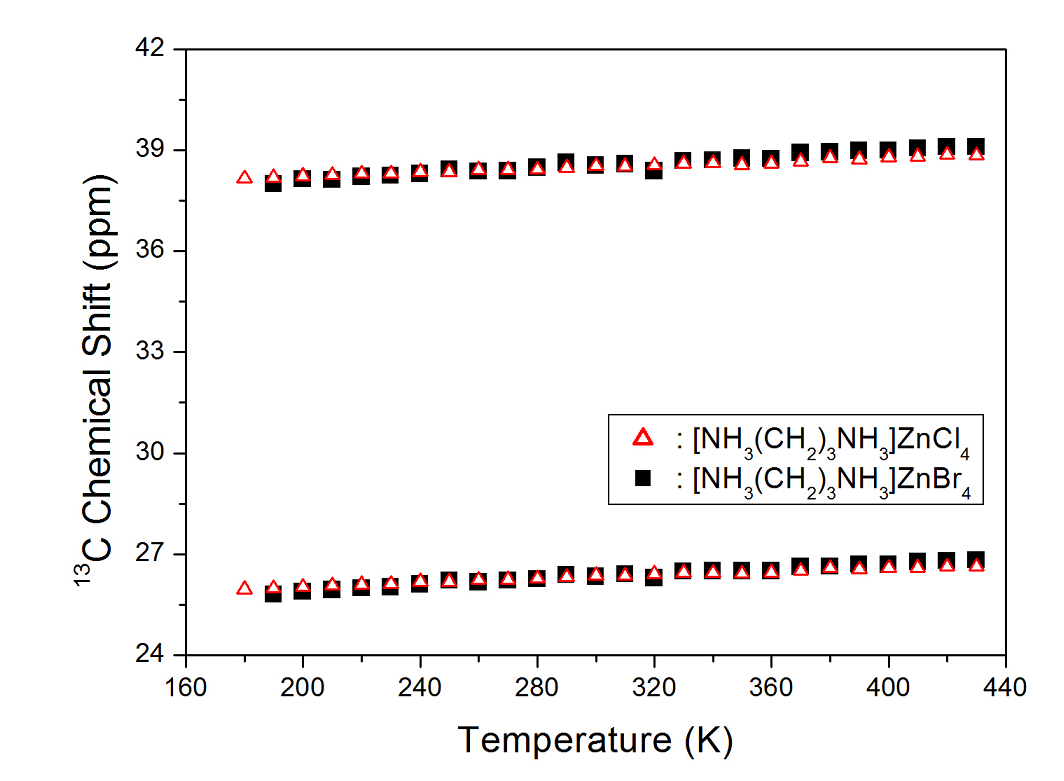


Supplementary Figure 1. Chemical shifts of [NH3(CH2)3NH3]Zn*X*4 (*X*=Cl and Br) as a function of temperature.
